CORRECTION

# Correction: Treatment with native heterodimeric IL-15 increases cytotoxic lymphocytes and reduces SHIV RNA in lymph nodes

Dionysios C. Watson, Eirini Moysi, Antonio Valentin, Cristina Bergamaschi, Santhi Devasundaram, Sotirios P. Fortis, Jenifer Bear, Elena Chertova, Julian Bess, Jr., Ray Sowder, David J. Venzon, Claire Deleage, Jacob D. Estes, Jeffrey D. Lifson, Constantinos Petrovas, Barbara K. Felber, George N. Pavlakis

An affiliation is missing for the first author. In addition to the current affiliation information, Dionysios C. Watson is affiliated with: Department of Medicine, University of Patras, Greece.

## Reference

1. Watson DC, Moysi E, Valentin A, Bergamaschi C, Devasundaram S, Fortis SP, et al. (2018) Treatment with native heterodimeric IL-15 increases cytotoxic lymphocytes and reduces SHIV RNA in lymph nodes. *PLoS Pathog* 14(2): e1006902. <https://doi.org/10.1371/journal.ppat.1006902> PMID: 29474450

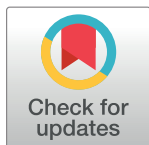

## OPEN ACCESS

**Citation:** Watson DC, Moysi E, Valentin A, Bergamaschi C, Devasundaram S, Fortis SP, et al. (2018) Correction: Treatment with native heterodimeric IL-15 increases cytotoxic lymphocytes and reduces SHIV RNA in lymph nodes. *PLoS Pathog* 14(10): e1007345. <https://doi.org/10.1371/journal.ppat.1007345>

**Published:** October 11, 2018

**Copyright:** © 2018 Watson et al. This is an open access article distributed under the terms of the [Creative Commons Attribution License](https://creativecommons.org/licenses/by/4.0/), which permits unrestricted use, distribution, and reproduction in any medium, provided the original author and source are credited.
